# Supplementary material for: Aerobic Vaginal Microflora in Gestational and Non-Gestational Bitches (Canis lupus familiaris)
Source: MDPI journal article supplement (doi:10.3390/ani14101501), 2024-05-18
Supplement: s1 [file s1]

Table S1. Co-isolations of bacteria

| G+ bacterias                      |                                  | G- bacterias          |                       |
|-----------------------------------|----------------------------------|-----------------------|-----------------------|
| <i>Staphylococcus β hemolytic</i> | <i>Bacillus spp</i>              | <i>E. coli</i>        |                       |
| <i>E. faecium</i>                 |                                  | <i>E. coli</i>        |                       |
| <i>S. xylosus</i>                 |                                  | <i>A. radiobacter</i> | <i>P. aeruginosa</i>  |
|                                   |                                  | <i>A. radiobacter</i> | <i>O. anthropi</i>    |
| <i>Staphylococcus spp</i>         |                                  | <i>A. radiobacter</i> | <i>A. hydrophila</i>  |
| <i>Staphylococcus spp</i>         |                                  | <i>A. radiobacter</i> |                       |
|                                   |                                  | <i>A. radiobacter</i> | <i>P. aeruginosa</i>  |
| <i>Staphylococcus spp</i>         |                                  | <i>A. radiobacter</i> |                       |
| <i>Staphylococcus spp</i>         |                                  | <i>A. radiobacter</i> |                       |
| <i>Staphylococcus spp</i>         |                                  | <i>P. aeruginosa</i>  |                       |
| <i>Staphylococcus spp</i>         | <i>Bacillus spp</i>              | <i>Proteus spp</i>    |                       |
| <i>Staphylococcus α hemolytic</i> |                                  | <i>Proteus spp</i>    |                       |
| <i>Staphylococcus β hemolytic</i> |                                  | <i>P. mirabilis</i>   | <i>C. violaceum</i>   |
| <i>A. viridans</i>                | <i>Bacillus spp</i>              |                       |                       |
| <i>M. luteus</i>                  | <i>Streptococcus spp</i>         |                       |                       |
| <i>Staphylococcus spp</i>         |                                  | <i>Klebsiella spp</i> |                       |
| <i>S. anginosus/sanguinis</i>     | <i>Bacillus spp</i>              |                       |                       |
| <i>Staphylococcus spp</i>         |                                  |                       |                       |
|                                   | <i>Bacillus spp</i>              | <i>E. coli</i>        |                       |
| <i>Staphylococcus β hemolytic</i> |                                  |                       |                       |
|                                   |                                  | <i>Proteus spp</i>    | <i>P. vulgaris</i>    |
| <i>Staphylococcus spp</i>         | <i>Streptococcus α hemolytic</i> |                       |                       |
| <i>Staphylococcus spp</i>         |                                  |                       | <i>B.mallei</i>       |
| <i>Staphylococcus β hemolytic</i> | <i>Bacillus spp</i>              |                       |                       |
| <i>Staphylococcus spp</i>         | <i>B. pumilus</i>                |                       |                       |
|                                   | <i>Bacillus spp</i>              | <i>Proteus spp</i>    | <i>Klebsiella spp</i> |

Abbreviations: *A. viridans*, *Aerococcus viridans*; *A. hydrophila*, *Aeromonas hydrophila*; *A. radiobacter*, *Agrobacterium radiobacter*; *B. pumilus*, *Bacillus pumillus*; *B. mallei*, *Burkholderia mallei*; *C. violaceum*, *Chromobacterium violaceum*; *E. coli*, *Escherichia coli*; *E. faecium*, *Enterococcus faecium*; *M. luteus*, *Micrococcus luteus*; *O. anthropic*, *Ochrobactrum anthropi*; *P. vulgaris*, *Proteus vulgaris*; *P. aeruginosa*, *Pseudomonas aeruginosa*; *S. xylosus*, *Staphylococcus xylosus*; *S. anginosus*, *Streptococcus anginosus*; *S. sanguinis*, *Streptococcus sanguinis*.
